# Supplementary material for: A cell-based model system links chromothripsis with hyperploidy
Source: PubMed Central journal article supplement (PMC4592670; doi:10.15252/msb.20156505), 2015-09-28
Supplement: msb0011-0828-sd7.pdf [file msb0011-0828-sd7.pdf]

## A cell-based model system links chromothripsis with hyperploidy

Balca R. Mardin, Alexandros P. Drainas, Sebastian M. Waszak, Joachim Weischenfeldt, Mayumi Isokane, Adrian M. Stutz, Benjamin Raeder, Theodoris Efthymiopoulos, Christopher Buccitelli, Maia Segura-Wang, Paul Northcott, Stefan M. Pfister, Peter Lichter, Dr. Jan Ellenberg and Jan O Korb

*Corresponding author: Dr. Jan Korb, EMBL*

---

### Review timeline:

|                     |                |
|---------------------|----------------|
| Submission date:    | 13 August 2015 |
| Editorial Decision: | 18 August 2015 |
| Revision received:  | 24 August 2015 |
| Accepted:           | 28 August 2015 |

---

Editor: Maria Polychronidou

Please note that the manuscript was previously reviewed at another journal and the reports were taken into account in the decision making process at MSB. Since the original reviews are not subject to MSB's transparent review process policy, the reports and author response cannot be published
